# Supplementary material for: Stabilization of Sur8 via PKCα/δ degradation promotes transformation and migration of colorectal cancer cells
Source: PubMed Central journal article supplement (PMC5777796; doi:10.18632/oncotarget.23313), 2017-12-14
Supplement: oncotarget-08-115596-s001.pdf [file oncotarget-08-115596-s001.pdf]

# Stabilization of Sur8 via PKC $\alpha/\delta$ degradation promotes transformation and migration of colorectal cancer cells

## SUPPLEMENTARY MATERIALS

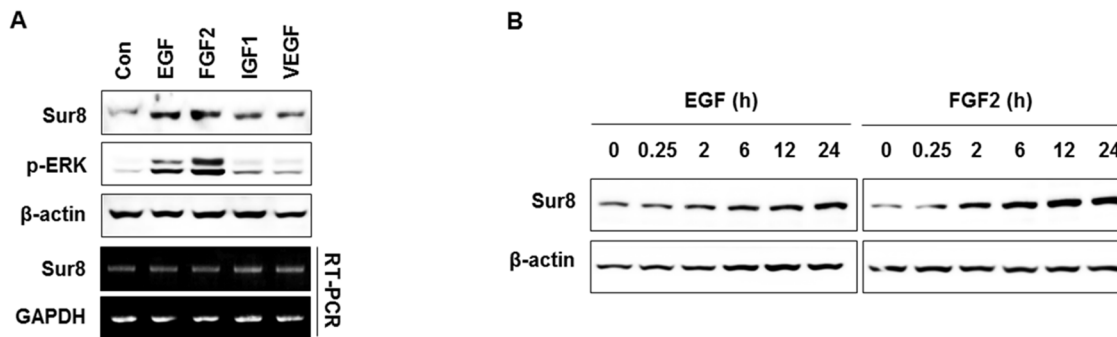

**Supplementary Figure 1: Effects of growth factors on Sur8 protein levels.** (A) HEK293 cells were treated with PBS (control); 20 ng/mL EGF, FGF2, or VEGF; or 50 ng/mL IGF-1 for 24 hours. WCEs were immunoblotted against Sur8, p-ERK, and  $\beta$ -actin, and mRNA levels of Sur8 and GAPDH were detected by using RT-PCR. (B) Cells were treated with 20 ng/mL of EGF and FGF2 at six different time points as indicated. WCEs were immunoblotted against Sur8 and  $\beta$ -actin.

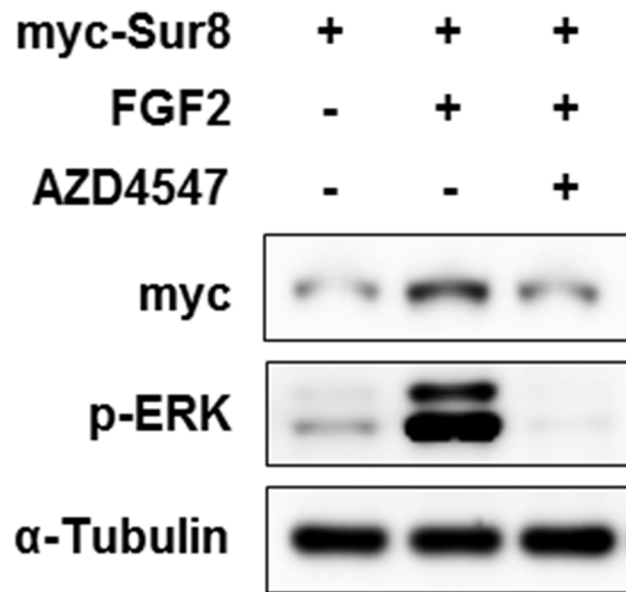

**Supplementary Figure 2: Effects of AZD4547 on Sur8 stability.** HEK293 cells were transfected with myc-tagged Sur8. At 24 hour post-transfection, the cells were treated with FGF2 alone or together with a selective FGFR inhibitor, 100 nM of AZD4547 for 24 hours. WCEs were subjected to immunoblotting with anti-myc, anti-p-ERK or anti- $\alpha$ -Tubulin antibody.

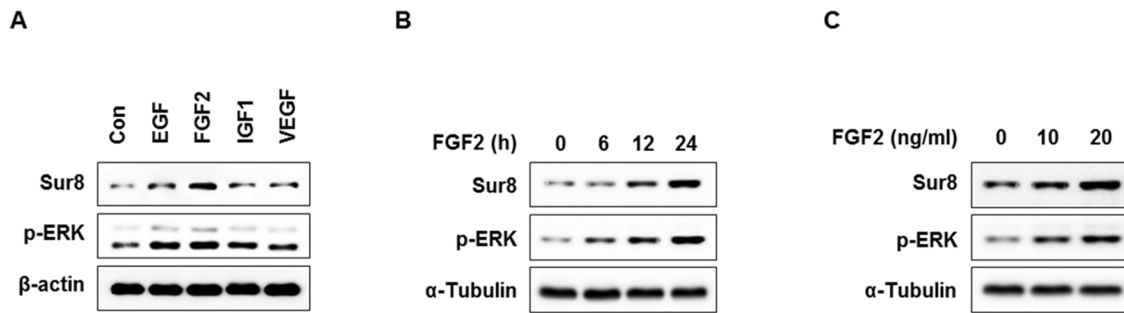

**Supplementary Figure 3: Effects of growth factors on Sur8 stability in DLD-1 cells.** (A) DLD-1 human CRC cells were treated with PBS (control); 20 ng/mL EGF, FGF2, or VEGF; or 50 ng/mL IGF-1 for 24 hours. (B, C) DLD-1 cells were treated with FGF2 in a time- (B) and concentration- (C) dependent manner, as indicated. WCEs were immunoblotted against the indicated proteins (A-C).

A

| Serine Prediction |       | Threonine Prediction |       |
|-------------------|-------|----------------------|-------|
| Residue           | Score | Residue              | Score |
| S11               | 0.996 | T45                  | 0.509 |
| S20               | 0.995 | T71                  | 0.865 |
| S31               | 0.942 | T81                  | 0.931 |
| S38               | 0.978 | T205                 | 0.813 |
| S57               | 0.801 | T206                 | 0.964 |
| S58               | 0.647 | T402                 | 0.521 |
| S67               | 0.794 |                      |       |
| S85               | 0.986 |                      |       |
| S86               | 0.934 |                      |       |
| S108              | 0.938 |                      |       |
| S118              | 0.986 |                      |       |
| S160              | 0.988 |                      |       |
| S164              | 0.985 |                      |       |

  

| Tyrosin Prediction |       |
|--------------------|-------|
| Residue            | Score |
| Y523               | 0.939 |

B

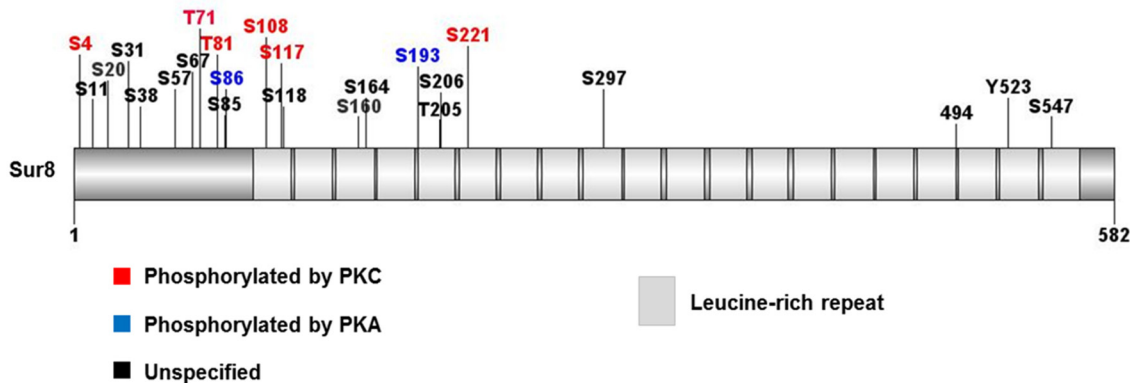

**Supplementary Figure 4: Prediction of putative amino acid residues and kinases for phosphorylation in human Sur8.**

(A) Protein sequences of human Sur8 were analyzed by using NetPhos 2.0 (<http://www.cbs.dtu.dk/services/NetPhos-2.0/>). Possible phosphorylated residues having output scores above the threshold of 0.5 are shown. (B) Putative kinases and their predicted phosphorylation on amino acid residues of Sur8 were predicted using NetPhos 3.1 (<http://www.cbs.dtu.dk/services/NetPhos/>) with output scores above 0.75. Out of 24 possible phosphorylated residues of Sur8, 6 amino acid residues (red) were predicted for PKC phosphorylation sites, 2 amino acid residues (blue) for PKA phosphorylation, and the rest (black) were unspecified. Scores over 0.5 with a maximum score of 1 indicate that the residue is a possible phosphorylation site.

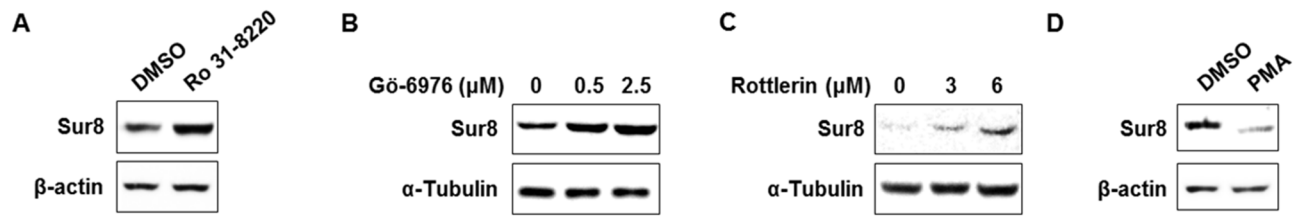

**Supplementary Figure 5: Effects of chemical activation and inhibition of PKC on Sur8 protein level.** (A-D) HEK293 cells were treated with a pan-PKC inhibitor, Ro 31-8220 (A); a classical PKC inhibitor, Gö6976 (B); a PKC $\delta$  inhibitor, rottlerin (C); and a pan-PKC activator, Phorbol 12-myristate 13-acetate (PMA) (D) for 24 hours. WCEs were immunoblotted for Sur8 and  $\beta$ -actin.

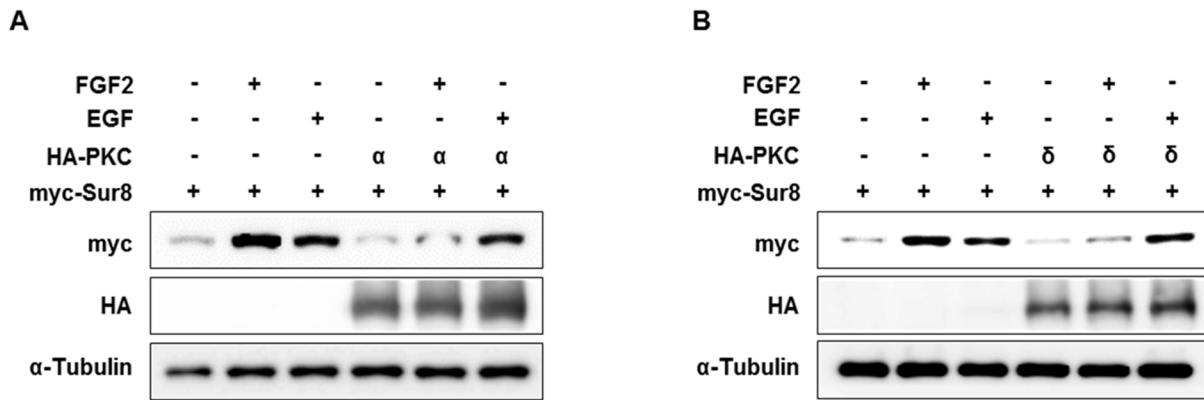

**Supplementary Figure 6: Effects of PKC $\alpha$ / $\delta$  overexpression on FGF2- or EGF-induced Sur8 stabilization.** (A, B) HEK293 cells were transfected with myc-tagged Sur8 and HA-tagged PKC $\alpha$  (A) or PKC $\delta$  (B). At 24 hour post-transfection, cells were treated with FGF2 or EGF for 24 hours as indicated. WCEs were subjected to immunoblotting against HA, myc, and  $\alpha$ -Tubulin.

|                         | T71                                                           | S297 |
|-------------------------|---------------------------------------------------------------|------|
| <b>Sur8 (Hu)</b>        | VAFSVDN <b>T I K</b> RPNPAPG.....GLRYN <b>R L S</b> AIPRSLAKC |      |
| <b>Sur8 (Rat)</b>       | VAFSVDN <b>T I K</b> RPNPALG.....GLRYN <b>R L S</b> AIPRSLAKC |      |
| <b>Sur8 (M)</b>         | VAFSVDN <b>T I K</b> RPNPAPG.....GLRYN <b>R L S</b> AIPRSLAKC |      |
| <b>Sur8 (C.elegans)</b> | VAFSVDN <b>T I K</b> RPNPAPG.....GLRYN <b>R L S</b> AIPRSLAKC |      |

**Supplementary Figure 7: The PKC $\alpha$  and PKC $\delta$  phosphorylation consensus sequences of Sur8.** Alignment of Sur8 amino acid sequences from various species demonstrates high evolutionary sequence conservation at T71 and S297, the phosphorylation sites for PKC $\alpha$  and PKC $\delta$ , respectively. Phosphorylation sites are highlighted in blue and the remaining consensus sequences are highlighted as indicated.

### Substrate Consensus Sequence for PKC

|   |   |     |     |   |     |   |     |   |   |   |
|---|---|-----|-----|---|-----|---|-----|---|---|---|
| · | · | R/K | X   | X | S/T | · | ·   | · | · | · |
| · | · | ·   | R/K | X | S/T | · | ·   | · | · | · |
| · | · | ·   | ·   | · | S/T | X | R/K | · | · | · |

### Substrates of PKC $\alpha$ :

|                       |         |
|-----------------------|---------|
| Raf-1                 | Ser 259 |
| p47phox               | Ser 304 |
| eNOS                  | Thr 495 |
| Connexin_43           | Ser 368 |
| HMGA1                 | Ser 44  |
| DAG kinase (DGK) zeta | Ser 266 |
| NMDA receptor         | Ser 890 |
| Sur8                  | Thr 71  |

|   |   |   |   |   |   |   |   |   |   |   |
|---|---|---|---|---|---|---|---|---|---|---|
| R | Q | R | S | T | S | T | P | N | V | H |
| P | P | R | R | S | S | I | R | N | A | H |
| I | T | R | K | K | T | F | K | E | V | A |
| P | S | S | R | A | S | S | R | A | S | S |
| T | A | L | V | G | S | Q | K | E | P | S |
| K | K | K | R | A | S | F | K | R | R | S |
| S | T | L | A | S | S | F | R | R | R | S |
| F | S | V | D | N | T | I | K | R | P | N |

### Substrates of PKC $\delta$ :

|              |         |
|--------------|---------|
| PKC delta    | Thr 295 |
| EGF-receptor | Thr 680 |
| LIMK2        | Ser 283 |
| p300 CBP     | Ser 89  |
| eEF-1 alpha  | Thr 432 |
| p73beta      | Ser 289 |
| PKC delta    | Ser 302 |
| Sur8         | Ser 297 |

|   |   |   |   |   |   |   |   |   |   |   |
|---|---|---|---|---|---|---|---|---|---|---|
| A | L | N | Q | V | T | Q | R | A | S | R |
| I | V | R | K | R | T | L | R | R | L | L |
| T | L | R | R | R | S | L | R | R | S | N |
| L | L | R | S | G | S | S | P | N | L | N |
| R | D | M | R | Q | T | V | A | V | G | V |
| V | L | G | R | R | S | F | E | G | R | I |
| R | A | S | R | R | S | D | S | A | S | S |
| R | Y | N | R | L | S | A | I | P | R | S |

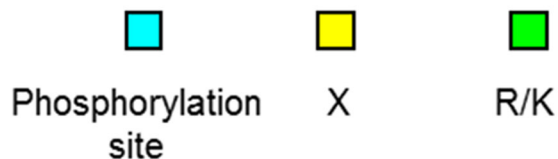

**Supplementary Figure 8: Alignment of the amino acid sequences of Sur8 with those of other known PKC $\alpha$  and PKC $\delta$  substrates.** Sequences of human Sur8 and other known substrates of PKC $\alpha$  and PKC $\delta$  are shown for comparison. The PKC consensus sequences [R/K]XX[pS/pT], [R/K]X[pS/pT], or [pS/pT]X[R/K] are indicated as phosphorylation sites shown in blue, the remaining consensus residues R/K in green, and any amino acid X in yellow.



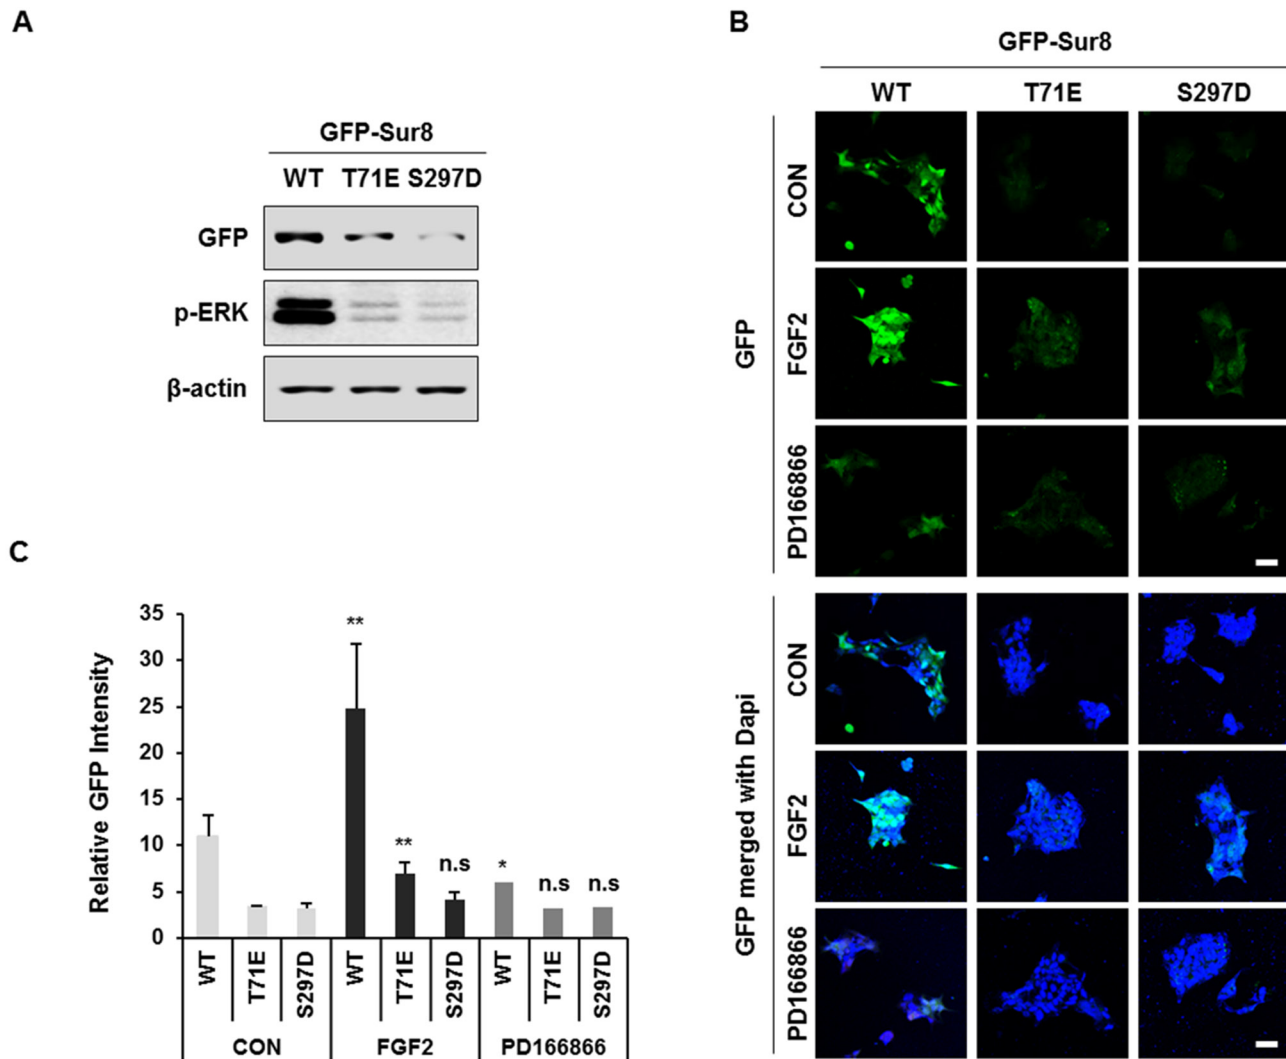

**Supplementary Figure 9: Effects of Sur8 mutations mimicking PKC $\alpha/\delta$  phosphorylation on Sur8 level and ERK activity.** (A) WCEs from GFP-Sur8-WT, GFP-Sur8-T71E, or GFP-Sur8-S297D which were rescued in DLD-1 stable cell lines were immunoblotted with anti-GFP, anti-p-ERK or anti- $\beta$ -actin antibody. (B, C) Fluorescent images for GFP in GFP-Sur8-WT, GFP-Sur8-T71E, or GFP-Sur8-S297D DLD-1 stable cell lines treated with PBS (control), FGF2, or PD166866 for 24 hours. Cell nuclei were stained with DAPI. Scale bars, 100  $\mu$ m. \* $P < 0.05$ , \*\* $P < 0.01$ .

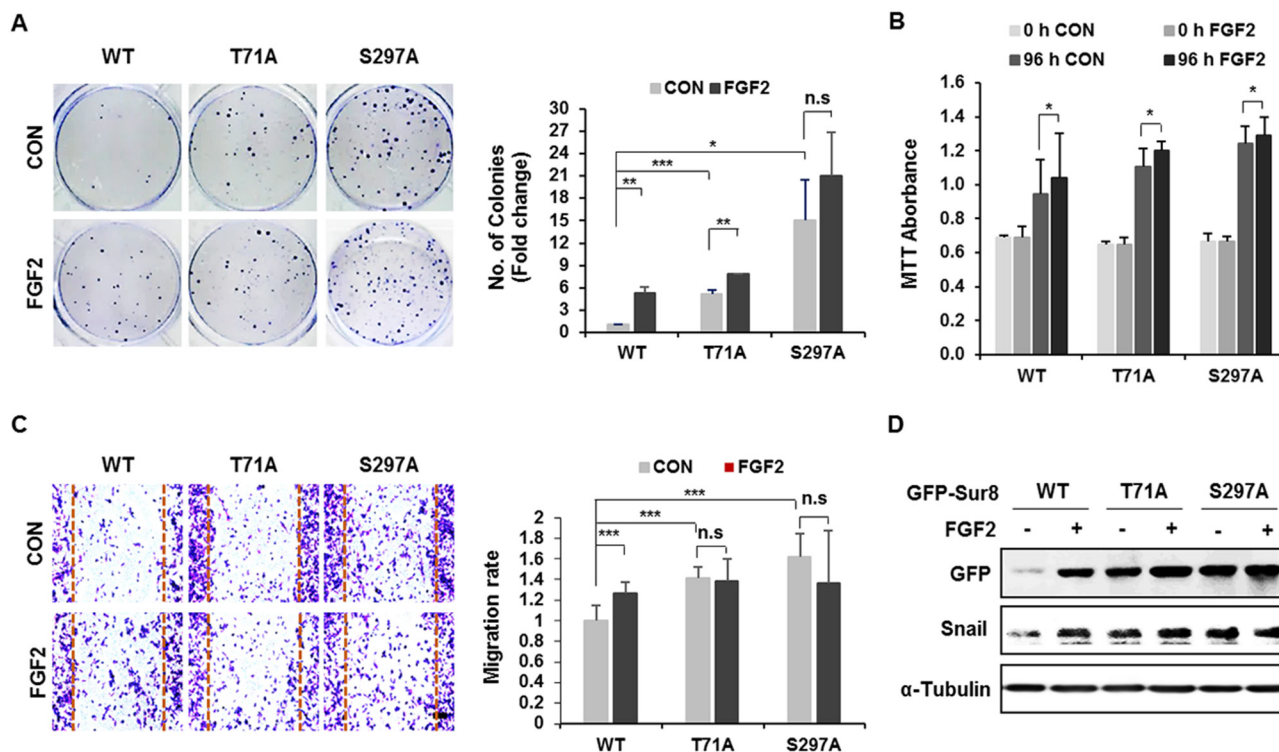

**Supplementary Figure 10: Effects of nonphosphorylatable mutations of Sur8 on transformation, proliferation, and migration of SW480 cells.** (A-D) SW480 cells expressing GFP-Sur8-WT, GFP-Sur8-T71A, or GFP-Sur8-S297A were treated with control or FGF2, and assessed for transformation, proliferation, and migration potential, and immunoblot analysis. Foci-forming assays were conducted for 2 weeks. Quantification of colony number is shown on right (A). Anchorage-dependent cell growth rates were determined by MTT assay (B). Number of migrated cells was counted after 36 hours of wound scratch to show migratory potential. Scale bars, 500  $\mu$ m (C). Colonies and cells were stained with crystal violet (A, C). All the values are calculated by student's *t*-test. \**P* < 0.05, \*\**P* < 0.01, \*\*\**P* < 0.001. WCEs were immunoblotted for detection of the EMT-related mesenchymal marker, Snail (D).

Supplementary Table 1: Primers used for site-directed mutagenesis of *Sur8*

| Mutation | Orientation | Primer Sequence                                          |
|----------|-------------|----------------------------------------------------------|
| T71A     | Forward     | 5'-GCATTTTCAGTTGACAAT <u>GCG</u> GATCAAACGGCCAAACCCA -3' |
|          | Reverse     | 5'-TGGGTTTGGCCGTTTGAT <u>CGC</u> ATTGTCAACTGAAAATGC-3'   |
| T71E     | Forward     | 5'-GCATTTTCAGTTGACAAT <u>GAG</u> GATCAAACGGCCAAACCCA-3'  |
|          | Reverse     | 5'-TGGGTTTGGCCGTTTGAT <u>CTC</u> ATTGTCAACTGAAAATGC-3'   |
| S297A    | Forward     | 5'-AGATATAACAGACT <u>GGC</u> CAGCAATACCCAGATCA-3'        |
|          | Reverse     | 5'-TGATCTGGGTATTGCT <u>GCC</u> CAGTCTGTTATATCT-3'        |
| S297D    | Forward     | 5'-CTGAGATATAACAGACT <u>GGA</u> CGCAATACCCAGATCATT-3'    |
|          | Reverse     | 5'-TAATGATCTGGGTATT <u>GCGTCC</u> CAGTCTGTTATATCTCAG-3'  |
